# Supplementary material for: Identification of Copy Number Variants in a Southern Chinese Cohort of Patients with Congenital Scoliosis
Source: MDPI journal article supplement (doi:10.3390/genes12081213), 2021-08-05
Supplement: s1 [file s1]

# Supplementary Figure 1

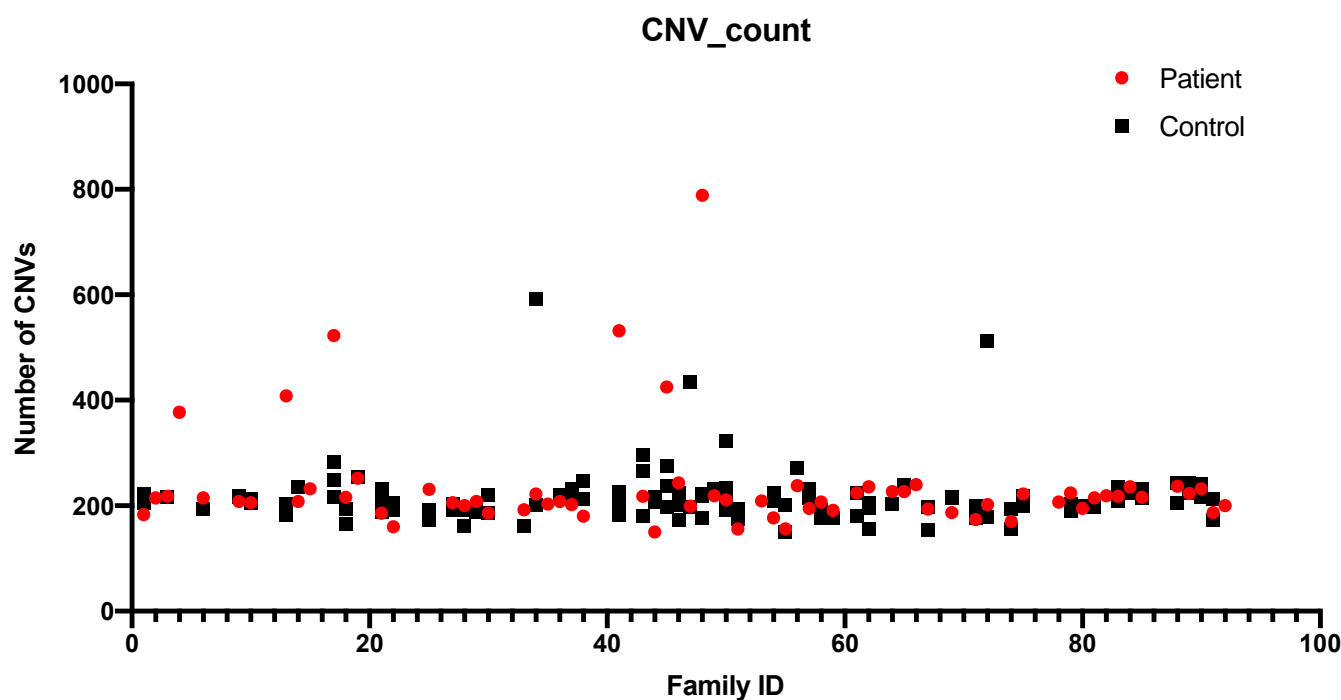

**Figure S1.** Total number of CNVs called from whole exome sequencing data by ExomeDepth in each patient and family control. There is no statistically significant difference between patient and control groups (student  $t$  test,  $p=0.207$ ).

# Supplementary Figure 2

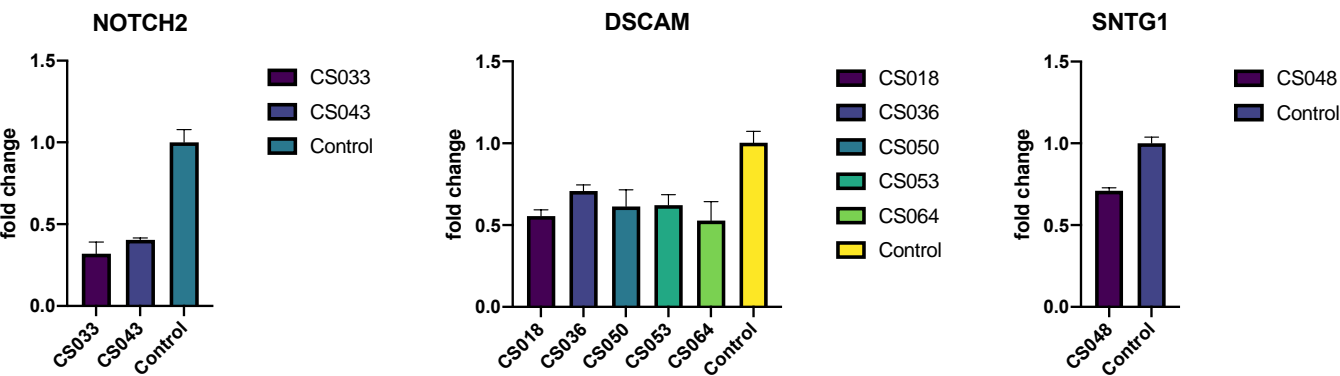

**Figure S2.** Quantitative PCR analysis for validating the heterozygous deletion on *NOTCH2*, *DSCAM*, and *SNTG1* loci. The locus (P1) outside the deletion region was used as a reference site. Control samples were selected from family members with normal copy number on the these loci.

### Supplementary Figure 3

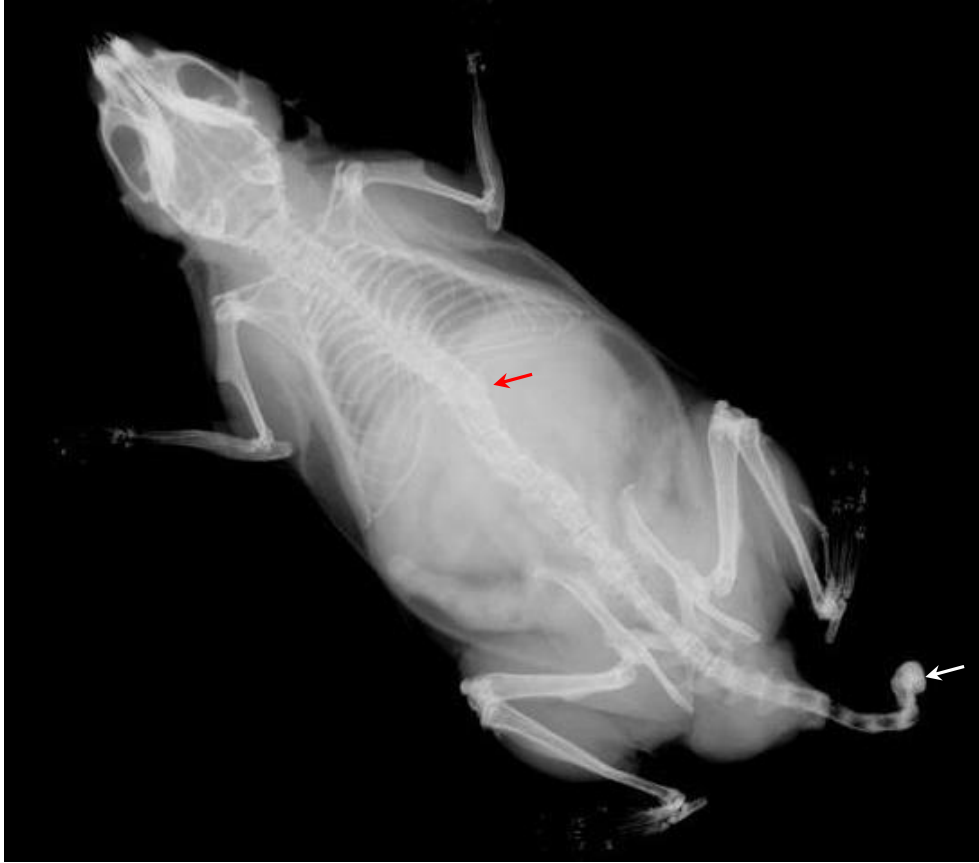

**Figure S3.** The X-ray of *Mysm1* homozygous mutant mouse (*Mysm1<sup>tm1a(KOMP)Wtsi</sup>*) obtained from International Mouse Phenotyping Consortium (IMPC) website (<https://www.mousephenotype.org/data/genes/MGI:2444584>). The red arrow points to the place of vertebral malformation and the white arrow points to the truncated and kinky tail.
