# Supplementary material for: Identification of Copy Number Variants in a Southern Chinese Cohort of Patients with Congenital Scoliosis
Source: Genes (Basel). 2021 Aug 5;12(8):1213. doi: 10.3390/genes12081213 (PMC8391542; doi:10.3390/genes12081213)
Supplement: Supplementary file 1 [file genes-12-01213-s001.zip › Supplementary Table 1.xlsx]

## Sheet: Deno CNVs
Gene	Patient	Type	Chr	Start	End	Size (bp)	Bayes Factor	Reads ratio (observed/ expected)	Exons annotation (hg19) (Gene_exon)	Inheritance pattern	Frequency in 67 patients	Frequency in 125 controls	Higest Frequency in DGV (sample size >100)	gnomAD_Structural_Variants Frquency	gnomAD_East Asia_Structural_Variants Frquency
LRRC40	CS013	deletion	1	70616812	70653021	36209	12.6	0.631	LRRC40_3-13	De novo	0.0597015	0	0.00955691	4.61e-05	0
	CS017	deletion	1	70616812	70654956	38144	10	0.543	LRRC40_2-13	De novo	0.0597015	0	0.00955691	4.61e-05	0
	CS041	deletion	1	70257727	70641665	383938	23.8	0.779	LRRC7_2-25,LRRC40_7-15	De novo	0.0597015	0	0.00955691	4.61e-05	0
	CS048	deletion	1	70616812	70646892	30080	11.4	0.685	LRRC40_5-13	De novo	0.0597015	0	0.00955691	4.61e-05	0
SCN7A	CS004	deletion	2	167330310	167330854	544	4.9	0.577	SCN7A_3-4	N.D.	0.0597015	0	0.00225734	4.61e-05	0
	CS013	deletion	2	167266731	167269177	2446	5.1	0.526	SCN7A_22-23	De novo	0.0597015	0	0.00225734	4.61e-05	0
	CS041	deletion	2	167322292	167334206	11914	7.3	0.449	SCN7A_2-7	De novo	0.0597015	0	0.00225734	4.61e-05	0
	CS066	deletion	2	167330310	167330854	544	6.28	0.549	SCN7A_3-4	N.D.	0.0597015	0	0.00225734	4.61e-05	0
MME	CS013	deletion	3	154802849	154858081	55232	7.59	0.717	MME_3-10	De novo	0.0597015	0	0.000798722	4.62e-05	0
	CS041	deletion	3	154859781	154890401	30620	8.38	0.66	MME_11-22	De novo	0.0597015	0	0.000798722	4.62e-05	0
	CS045	deletion	3	154834269	154834548	279	6.62	0.634	MME_5-6	De novo	0.0597015	0	0.000798722	4.62e-05	0
	CS048	deletion	3	154802849	154858081	55232	11.5	0.667	MME_3-10	De novo	0.0597015	0	0.000798722	4.62e-05	0
TBX6	CS059	deletion	16	29674601	30199897	525296	644	0.555	SPN_2,AC009133.19_2-3,QPRT_1-4,C16orf54_2,ZG16_2-4,KIF22_1- 13,MAZ_1- 5,PRRT2_2-3,PAGR1_1-3,CTD-2574D22.6_1-2,MVP_2-15,CDIPT_6-2,SEZ6L2_16-1,ASPHD1_1-3,KCTD13_6- 1,TMEM219_1-4,TAOK2_2-16,HIRIP3_7-1,INO80E_1-7,DOC2A_11-2,C16orf92_2-3,FAM57B_5-1,ALDOA_8-16,PPP4C_2-9,TBX6_9-2,YPEL3_4-1,GDPD3_10-1,MAPK3_8-1,CORO1A_2-3,CORO1A_4-10	N.D.	0.0597015	0	0.0005	0.0001462	0
	CS071	deletion	16	29495011	30218221	723210	754	0.572	NPIPL3_3-1,SPN_2,AC009133.19_2-3,QPRT_1-4,C16orf54_2,ZG16_3-4,KIF22_2-12,MAZ_1-5,PRRT2_2-3,PAGR1_1-3,CTD-2574D22.6_1-2,MVP_2-15,CDIPT_6-2,SEZ6L2_16-1,ASPHD1_1-3,KCTD13_6-1,TMEM219_1-4,TAOK2_2-16,HIRIP3_7-2,INO80E_1-7,DOC2A_11-2,C16orf92_2- 3,FAM57B_5-1,ALDOA_8-16,PPP4C_2-9,TBX6_9-2,YPEL3_4-1,GDPD3_10-1,MAPK3_8-1,CORO1A_2-11,BOLA2B_3-1,SLX1A_1-5,SULT1A3_3-9,RP11-347C12.3_5-2	De novo	0.0597015	0	0.0005	0.0001462	0
	CS078	deletion	16	29498516	30199897	701381	690	0.578	NPIPL3_1,SPN_2,AC009133.19_2-3,QPRT_1-4,C16orf54_2,ZG16_3-4,KIF22_2-12,MAZ_1-5,PRRT2_2-3,PAGR1_1-3,CTD-2574D22.6_1-2, MVP_2-15,CDIPT_6-2,SEZ6L2_16-1,ASPHD1_1-3,KCTD13_6-1,TMEM219_1-4,TAOK2_2-16,HIRIP3_7-2,INO80E_1-7,DOC2A_11-2,C16orf92_2-3,FAM57B_5-1,ALDOA_8-16,PPP4C_2-9,TBX6_9-2,YPEL3_4-1,GDPD3_10-1,MAPK3_8-1,CORO1A_2-10	N.D.	0.0597015	0	0.0005	0.0001462	0
	CS081	deletion	16	29498516	30199897	701381	645	0.558	NPIPL3_1,SPN_2,AC009133.19_2-3,QPRT_1-4,C16orf54_2,ZG16_3-4,KIF22_2-12,MAZ_1-5,PRRT2_2-3,PAGR1_1-3,CTD-2574D22.6_1-2, MVP_2-15,CDIPT_6-2,SEZ6L2_16-1,ASPHD1_1-3,KCTD13_6-1,TMEM219_1-4,TAOK2_2-16,HIRIP3_7-2,INO80E_1-7,DOC2A_11-2,C16orf92_2-3,FAM57B_5-1,ALDOA_8-16,PPP4C_2-9,TBX6_9-2,YPEL3_4-1,GDPD3_10-1,MAPK3_8-1,CORO1A_2-10	N.D.	0.0597015	0	0.0005	0.0001462	0
NAE1	CS013	deletion	16	66819690	66839929	20239	13.4	0.665	CCDC79_3-9,NAE1_18-20	De novo	0.0597015	0	NA	0	0
	CS017	deletion	16	66788880	66860683	71803	50.7	0.625	CCDC79_3-19,NAE1_2-20	De novo	0.0597015	0	NA	0	0
	CS041	deletion	16	66819690	66851390	31700	14.1	0.744	CCDC79_3-9,NAE1_9-20	De novo	0.0597015	0	NA	0	0
	CS048	deletion	16	66850485	66857209	6724	9.9	0.667	NAE1_6-11	De novo	0.0597015	0	NA	0	0
DHX40	CS004	deletion	17	57656834	57657240	406	5.38	0	DHX40_9-10	N.D.	0.149254	0.008	9.22e-05	0.0025	0.008152
	CS013	deletion	17	57650478	57652832	2354	7.02	0.606	DHX40_4-7	De novo	0.149254	0.008	9.22e-05	0.0025	0.008152
	CS017	deletion	17	57650478	57652832	2354	6.33	0.462	DHX40_4-7	De novo	0.149254	0.008	9.22e-05	0.0025	0.008152
	CS035	deletion	17	57656834	57657240	406	4.91	0	DHX40_9-10	N.D.	0.149254	0.008	9.22e-05	0.0025	0.008152
	CS043	deletion	17	57656834	57657240	406	6	0	DHX40_9-10	De novo	0.149254	0.008	9.22e-05	0.0025	0.008152
	CS048	deletion	17	57650478	57650596	118	4.97	0.368	DHX40_4	De novo	0.149254	0.008	9.22e-05	0.0025	0.008152
	CS050	deletion	17	57656834	57657240	406	7.23	0	DHX40_9-10	De novo	0.149254	0.008	9.22e-05	0.0025	0.008152
	CS053	deletion	17	57656834	57657240	406	7.02	0	DHX40_9-10	N.D.	0.149254	0.008	9.22e-05	0.0025	0.008152
	CS056	deletion	17	57676737	57676844	107	5.05	0.623	DHX40_14	N.D.	0.149254	0.008	9.22e-05	0.0025	0.008152
	CS057	deletion	17	57656834	57657240	406	6.29	0	DHX40_9-10	De novo	0.149254	0.008	9.22e-05	0.0025	0.008152
GMCL1	CS004	deletion	2	70076785	70088479	11694	7.29	0.548	GMCL1_8-10	N.D.	0.0746269	0.008	0.00130378	4.79e-05	0
	CS013	deletion	2	70071264	70088479	17215	6.77	0.568	GMCL1_6-10	De novo	0.0746269	0.008	0.00130378	4.79e-05	0
	CS017	deletion	2	70068075	70092107	24032	8.22	0.5	GMCL1_4-11	De novo	0.0746269	0.008	0.00130378	4.79e-05	0
	CS045	deletion	2	70071264	70088479	17215	6.1	0.739	GMCL1_6-10	De novo	0.0746269	0.008	0.00130378	4.79e-05	0
	CS048	deletion	2	70071264	70092107	20843	9.6	0.598	GMCL1_6-11	De novo	0.0746269	0.008	0.00130378	4.79e-05	0
MYSM1	CS013	deletion	1	59150826	59156089	5263	5.66	0.574	MYSM1_4-7	De novo	0.0597015	0.008	9.22e-05	4.61e-05	0.0004139
	CS017	deletion	1	59150826	59158603	7777	7.02	0.442	MYSM1_3-7	De novo	0.0597015	0.008	9.22e-05	4.61e-05	0.0004139
	CS045	deletion	1	59155899	59156089	190	5.12	0.584	MYSM1_4-5	De novo	0.0597015	0.008	9.22e-05	4.61e-05	0.0004139
	CS048	deletion	1	59150826	59160879	10053	8.79	0.609	MYSM1_2-7	De novo	0.0597015	0.008	9.22e-05	4.61e-05	0.0004139
RASA2	CS013	deletion	3	141328263	141331155	2892	6.74	0.594	RASA2_22-24	De novo	0.0597015	0.008	0.00086881	0	0
	CS017	deletion	3	141231006	141331155	100149	12.9	0.648	RASA2_2-24	De novo	0.0597015	0.008	0.00086881	0	0
	CS048	deletion	3	141231006	141331155	100149	19.2	0.734	RASA2_2-24	De novo	0.0597015	0.008	0.00086881	0	0
	CS062	deletion	3	141274683	141277804	3121	5.04	0.641	RASA2_7-8	De novo	0.0597015	0.008	0.00086881	0	0
NSMAF	CS013	deletion	8	59535780	59535983	203	6.38	0.317	NSMAF_8-9	De novo	0.0597015	0.008	0.00114548	0	0
	CS017	deletion	8	59535780	59548105	12325	6.57	0.509	NSMAF_3-9	De novo	0.0597015	0.008	0.00114548	0	0
	CS045	deletion	8	59535780	59535983	203	5.51	0.608	NSMAF_8-9	De novo	0.0597015	0.008	0.00114548	0	0
	CS048	deletion	8	59535780	59548105	12325	12	0.575	NSMAF_3-9	De novo	0.0597015	0.008	0.00114548	0	0
MNS1	CS013	deletion	15	56665640	56736052	70412	11	0.687	TEX9_3-12,MNS1_6-10	De novo	0.0597015	0.008	0.00518807	9.22e-05	0
	CS017	deletion	15	56665640	56981668	316028	23.6	0.637	TEX9_3-12,MNS1_2-10,ZNF280D_8-22	De novo	0.0597015	0.008	0.00518807	9.22e-05	0
	CS041	deletion	15	56676151	56999307	323156	33.8	0.622	TEX9_4-12,MNS1_2-10,ZNF280D_4-22	De novo	0.0597015	0.008	0.00518807	9.22e-05	0
	CS048	deletion	15	56683442	56736052	52610	8.95	0.709	TEX9_7-12,MNS1_6-10	De novo	0.0597015	0.008	0.00518807	9.22e-05	0
PHKB	CS013	deletion	16	47549433	47644831	95398	9.99	0.705	PHKB_6-14	De novo	0.0597015	0.008	0.00119808	4.81e-05	0
	CS017	deletion	16	47545577	47644831	99254	18.1	0.595	PHKB_5-14	De novo	0.0597015	0.008	0.00119808	4.81e-05	0
	CS041	deletion	16	47695631	47703328	7697	6.33	0.688	PHKB_23-26	De novo	0.0597015	0.008	0.00119808	4.81e-05	0
	CS041	deletion	16	47614207	47684832	70625	10.7	0.725	PHKB_8-20	De novo	0.0597015	0.008	0.00119808	4.81e-05	0
	CS048	deletion	16	47628049	47630442	2393	7.91	0.486	PHKB_12-13	De novo	0.0597015	0.008	0.00119808	4.81e-05	0
SPO11	CS013	deletion	20	55908245	55915234	6989	13	0.665	SPO11_3-11	De novo	0.0597015	0.008	0.00064226	0	0
	CS017	deletion	20	55906890	55940498	33608	20.6	0.662	SPO11_2-13,RAE1_2-5	De novo	0.0597015	0.008	0.00064226	0	0
	CS041	deletion	20	55917786	55918516	730	6.83	0.439	SPO11_12,SPO11_13	De novo	0.0597015	0.008	0.00064226	0	0
	CS048	deletion	20	55906890	55909151	2261	6.07	0.675	SPO11_2-5	De novo	0.0597015	0.008	0.00064226	0	0
ABCA6	CS022	duplication	17	67083495	67097075	13580	8.82	1.32	ABCA6_22-29	De novo	0.0597015	0.008	0.0009219	0	0
	CS027	duplication	17	67119381	67121176	1795	5.81	1.65	ABCA6_9-10	De novo	0.0597015	0.008	0.0009219	0	0
	CS044	duplication	17	67101604	67130008	28404	10.6	1.27	ABCA6_6-20	De novo	0.0597015	0.008	0.0009219	0	0
	CS091	duplication	17	67092382	67092942	560	5.01	1.76	ABCA6_24-25	De novo	0.0597015	0.008	0.0009219	0	0
Supplementary Table 1. Novel CNVs enriched in CS patients
N.D. the inheritance pattern is Not Determined due to lack of parents' data
